# Supplementary material
Source: PubMed Central journal article supplement (PMC5512083)
Supplement: 10.1074_M116.770776_jbc.M116.770776-1.pdf [file 10.1074_M116.770776_jbc.M116.770776-1.pdf]

## Supplementary Material

MS ID#: JBC/2016/770776

Stevens, Rayani et al.

Changes in the Dynamics of the Cardiac Troponin C Molecule Explain the Effects of Ca<sup>2+</sup> Sensitizing Mutations

**Table S1. Dimensions and composition of the simulated systems**

|      |                       | 100 ns<br>(Ca <sup>2+</sup> -bound) | PMF<br>Simulations | 100 ns<br>(TnC+Ca <sup>2+</sup> +TnI <sub>SW</sub> ) | 1 microsecond<br>(Ca <sup>2+</sup> Bound) |
|------|-----------------------|-------------------------------------|--------------------|------------------------------------------------------|-------------------------------------------|
| WT   | Box Dimensions (nm)   | 6 x 6 x 6                           | 15 x 6 x 6         | 7.65 x 7.65 x 7.65                                   | 6 x 6 x 6                                 |
|      | K <sup>+</sup> Ions   | 14                                  | 13                 | 11                                                   | 14                                        |
|      | Cl <sup>-</sup> Ions  | 1                                   | 0                  | 0                                                    | 1                                         |
|      | Ca <sup>2+</sup> Ions | 1                                   | 1                  | 1                                                    | 1                                         |
|      | Water Atoms           | 20077                               | 52044              | 39891                                                | 20077                                     |
| A8V  | Box Dimensions (nm)   | 6 x 6 x 6                           | 15 x 6 x 6         | 7.65 x 7.65 x 7.65                                   | 6 x 6 x 6                                 |
|      | K <sup>+</sup> Ions   | 14                                  | 13                 | 11                                                   | 14                                        |
|      | Cl <sup>-</sup> Ions  | 1                                   | 0                  | 0                                                    | 1                                         |
|      | Ca <sup>2+</sup> Ions | 1                                   | 1                  | 1                                                    | 1                                         |
|      | Water Atoms           | 20031                               | 52023              | 39882                                                | 20031                                     |
| L29Q | Box Dimensions (nm)   | 6 x 6 x 6                           | 15 x 6 x 6         | 7.65 x 7.65 x 7.65                                   | 6 x 6 x 6                                 |
|      | K <sup>+</sup> Ions   | 14                                  | 13                 | 11                                                   | 14                                        |
|      | Cl <sup>-</sup> Ions  | 1                                   | 0                  | 0                                                    | 1                                         |
|      | Ca <sup>2+</sup> Ions | 1                                   | 1                  | 1                                                    | 1                                         |
|      | Water Atoms           | 20043                               | 52038              | 39885                                                | 20043                                     |
| A31S | Box Dimensions (nm)   | 6 x 6 x 6                           | 15 x 6 x 6         | 7.65 x 7.65 x 7.65                                   | 6 x 6 x 6                                 |
|      | K <sup>+</sup> Ions   | 14                                  | 13                 | 11                                                   | 14                                        |
|      | Cl <sup>-</sup> Ions  | 1                                   | 0                  | 0                                                    | 1                                         |
|      | Ca <sup>2+</sup> Ions | 1                                   | 1                  | 1                                                    | 1                                         |
|      | Water Atoms           | 20034                               | 52029              | 39894                                                | 20034                                     |
| L48Q | Box Dimensions (nm)   | 6 x 6 x 6                           | 15 x 6 x 6         | 7.65 x 7.65 x 7.65                                   | 6 x 6 x 6                                 |
|      | K <sup>+</sup> Ions   | 14                                  | 13                 | 11                                                   | 14                                        |
|      | Cl <sup>-</sup> Ions  | 1                                   | 0                  | 0                                                    | 1                                         |
|      | Ca <sup>2+</sup> Ions | 1                                   | 1                  | 1                                                    | 1                                         |
|      | Water Atoms           | 20034                               | 52041              | 39894                                                | 20034                                     |
| Q50R | Box Dimensions (nm)   | 6 x 6 x 6                           | 15 x 6 x 6         | 7.65 x 7.65 x 7.65                                   | 6 x 6 x 6                                 |
|      | K <sup>+</sup> Ions   | 14                                  | 13                 | 11                                                   | 14                                        |
|      | Cl <sup>-</sup> Ions  | 1                                   | 0                  | 0                                                    | 1                                         |
|      | Ca <sup>2+</sup> Ions | 1                                   | 1                  | 1                                                    | 1                                         |
|      | Water Atoms           | 20040                               | 52032              | 39891                                                | 20040                                     |
| C84Y | Box Dimensions (nm)   | 6 x 6 x 6                           | 15 x 6 x 6         | 7.65 x 7.65 x 7.65                                   | 6 x 6 x 6                                 |
|      | K <sup>+</sup> Ions   | 14                                  | 13                 | 11                                                   | 14                                        |
|      | Cl <sup>-</sup> Ions  | 1                                   | 0                  | 0                                                    | 1                                         |
|      | Ca <sup>2+</sup> Ions | 1                                   | 1                  | 1                                                    | 1                                         |
|      | Water Atoms           | 20022                               | 52020              | 39876                                                | 20022                                     |

## Supplementary Material

MS ID#: JBC/2016/770776

Stevens, Rayani et al.

Changes in the Dynamics of the Cardiac Troponin C Molecule Explain the Effects of Ca<sup>2+</sup> Sensitizing Mutations

Table S2. Melting Temperatures of APO TnC constructs

| Construct      | WT | A8V  | L29Q | A31S | L48Q | Q50R | C84Y |
|----------------|----|------|------|------|------|------|------|
| Melt Temp (°C) | 64 | 58.5 | 65   | 65   | 42.5 | 65.5 | 64.5 |

Table S3. MD derived Ca<sup>2+</sup> Coordination Distances (Å). Distances are the average of 5 replicated 100 ns simulations.

|                     | WT         | A8V        | L29Q       | A31S       | L48Q       | Q50R       | C84Y       |
|---------------------|------------|------------|------------|------------|------------|------------|------------|
| <b>Ca-65ASP-OD1</b> | 3.4 ± 0.3  | 2.26 ± 0.2 | 2.99 ± 0.4 | 2.92 ± 0.3 | 3.07 ± 0.3 | 3.94 ± 0.5 | 2.89 ± 0.3 |
| <b>Ca-65ASP-OD2</b> | 2.96 ± 0.3 | 3.03 ± 0.2 | 3.13 ± 0.2 | 3.58 ± 0.3 | 3.25 ± 0.3 | 3.94 ± 0.4 | 3.86 ± 0.3 |
| <b>Ca-66GLU-OE1</b> | 8.58 ± 0.5 | 6.86 ± 0.3 | 8.56 ± 0.8 | 8.97 ± 0.5 | 8.67 ± 0.4 | 8.19 ± 0.5 | 8.09 ± 0.5 |
| <b>Ca-66GLU-OE2</b> | 8.59 ± 0.4 | 6.86 ± 0.3 | 8.57 ± 0.8 | 8.95 ± 0.5 | 8.67 ± 0.4 | 8.1 ± 0.6  | 8.08 ± 0.5 |
| <b>Ca-67ASP-OD1</b> | 2.8 ± 0.2  | 2.44 ± 0.2 | 2.81 ± 0.3 | 2.98 ± 0.3 | 3.17 ± 0.2 | 3.33 ± 0.3 | 4.15 ± 0.3 |
| <b>Ca-67ASP-OD2</b> | 2.94 ± 0.2 | 2.3 ± 0.2  | 2.63 ± 0.3 | 2.72 ± 0.1 | 2.7 ± 0.1  | 3.45 ± 0.5 | 4.14 ± 0.3 |
| <b>Ca-69SER-OG</b>  | 4.42 ± 0.3 | 3.29 ± 0.3 | 3.98 ± 0.5 | 4.35 ± 0.7 | 4.74 ± 0.4 | 4.91 ± 0.5 | 5.8 ± 0.6  |
| <b>Ca-69SER-O</b>   | 6.96 ± 0.3 | 5.44 ± 0.2 | 6.71 ± 0.6 | 7.05 ± 0.4 | 7.23 ± 0.2 | 7.49 ± 0.3 | 7.59 ± 0.3 |
| <b>Ca-71THR-OG1</b> | 5.57 ± 0.3 | 3.96 ± 0.2 | 4.8 ± 0.4  | 5.07 ± 0.3 | 5.47 ± 0.3 | 5.11 ± 0.3 | 4.95 ± 0.2 |
| <b>Ca-71THR-O</b>   | 3.36 ± 0.3 | 2.2 ± 0.1  | 2.75 ± 0.2 | 2.85 ± 0.2 | 3.18 ± 0.1 | 3.14 ± 0.2 | 2.79 ± 0.2 |
| <b>Ca-73ASP-OD1</b> | 4.73 ± 0.5 | 3.46 ± 0.3 | 4.63 ± 0.7 | 4.7 ± 0.7  | 5.43 ± 0.6 | 4.89 ± 1.0 | 3.65 ± 0.5 |
| <b>Ca-73ASP-OD2</b> | 4.19 ± 0.5 | 3.36 ± 0.7 | 4.6 ± 0.6  | 4.19 ± 0.3 | 5.85 ± 0.5 | 4.59 ± 1.1 | 3.77 ± 0.4 |
| <b>Ca-76GLU-OE1</b> | 2.68 ± 0.1 | 2.14 ± 0.1 | 2.59 ± 0.2 | 2.7 ± 0.1  | 2.67 ± 0.1 | 2.67 ± 0.1 | 2.63 ± 0.1 |
| <b>Ca-76GLU-OE2</b> | 2.7 ± 0.1  | 2.12 ± 0.1 | 2.54 ± 0.2 | 2.7 ± 0.1  | 2.67 ± 0.1 | 2.71 ± 0.1 | 2.68 ± 0.1 |

## Supplementary Material

MS ID#: JBC/2016/770776

Stevens, Rayani et al.

Changes in the Dynamics of the Cardiac Troponin C Molecule Explain the Effects of Ca<sup>2+</sup> Sensitizing Mutations

Table S4. Simulation-derived properties of WT cTnC and mutant constructs

|                                                        | <b>WT</b>  | <b>A8V</b> | <b>L29Q</b> | <b>A31S</b> | <b>L48Q</b> | <b>Q50R</b> | <b>C84Y</b> |
|--------------------------------------------------------|------------|------------|-------------|-------------|-------------|-------------|-------------|
| <b>Average h-sasa TnC+Ca (Closed) (nm<sup>2</sup>)</b> | 22.6 ± 0.3 | 22.6 ± 0.4 | 22.9 ± 0.4  | 22.3 ± 0.5  | 22.7 ± 0.6  | 22.5 ± 0.2  | 22.5 ± 0.4  |
| <b>Average h-sasa TnC+Ca (Open) (nm<sup>2</sup>)</b>   | 25.3 ± 0.7 | 24.8 ± 0.5 | 25.4±0.6    | 25.0 ± 0.6  | 25.6 ± 0.3  | 25.4 ± 0.3  | 25.5 ± 0.4  |
| <b>Number of H-bonds (Closed)</b>                      | 58.5±0.9   | 59.5 ± 1.7 | 58.9 ± 1.5  | 59.5 ± 1.4  | 59.7 ± 0.9  | 60.6 ± 2.0  | 60.6 ± 1.6  |

## Supplementary Material

MS ID#: JBC/2016/770776

Stevens, Rayani et al.

Changes in the Dynamics of the Cardiac Troponin C Molecule Explain the Effects of Ca<sup>2+</sup> Sensitizing Mutations

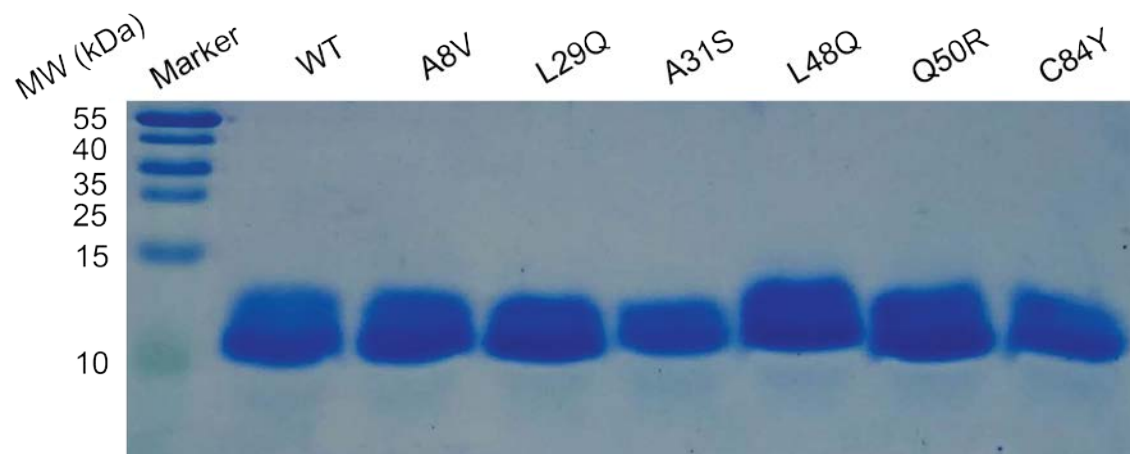

Figure S1. SDS PAGE of the N-cTnC constructs used in ITC. Each sample of WT and mutant N-cTnC samples was pure, free of degraded protein and ran at ~10.1 kDa.

## Supplementary Material

MS ID#: JBC/2016/770776

Stevens, Rayani et al.

Changes in the Dynamics of the Cardiac Troponin C Molecule Explain the Effects of Ca<sup>2+</sup> Sensitizing Mutations

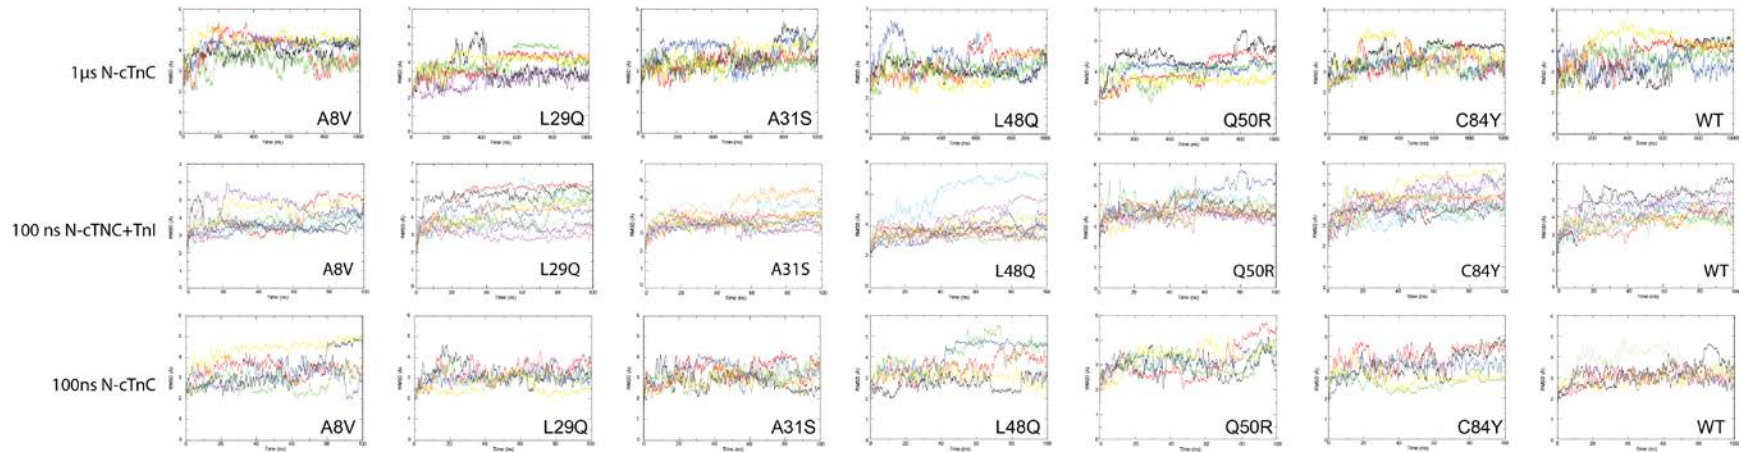

**Figure S2.** RMSD as a function of time for 1 μs and 100 ns simulations of TnC+Ca<sup>2+</sup>, and 100 ns of TnC+Ca<sup>2+</sup>+Tnl<sub>sw</sub> for each mutant construct. These indicate that each of the simulations has diverged substantially from the starting coordinates. Plots are a running average over 0.5% of the total number of data points.

## Supplementary Material

MS ID#: JBC/2016/770776

Stevens, Rayani et al.

Changes in the Dynamics of the Cardiac Troponin C Molecule Explain the Effects of Ca<sup>2+</sup> Sensitizing Mutations

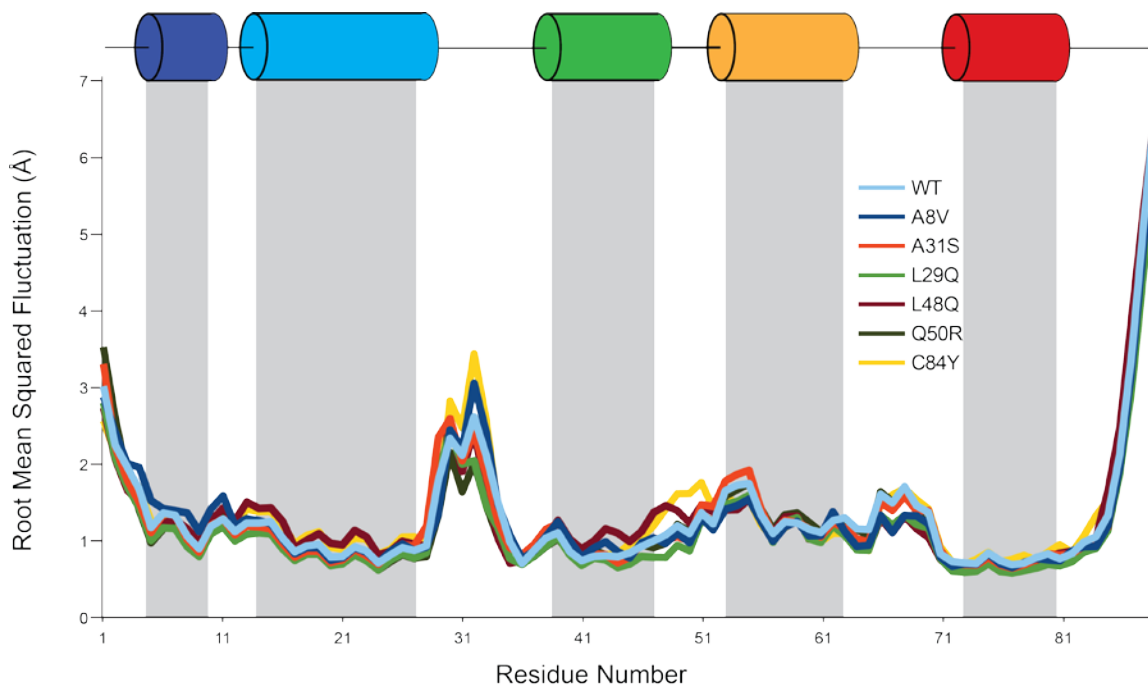

**Figure S3.** Root mean squared fluctuations (RMSF) plotted by residue for the models of WT NcTnC and each of the mutated constructs from 100 ns simulations. The local flexibility is similar for each for these constructs and is highest at the termini and loop regions between helices A and B.

## Supplementary Material

MS ID#: JBC/2016/770776

Stevens, Rayani et al.

Changes in the Dynamics of the Cardiac Troponin C Molecule Explain the Effects of  $\text{Ca}^{2+}$  Sensitizing Mutations

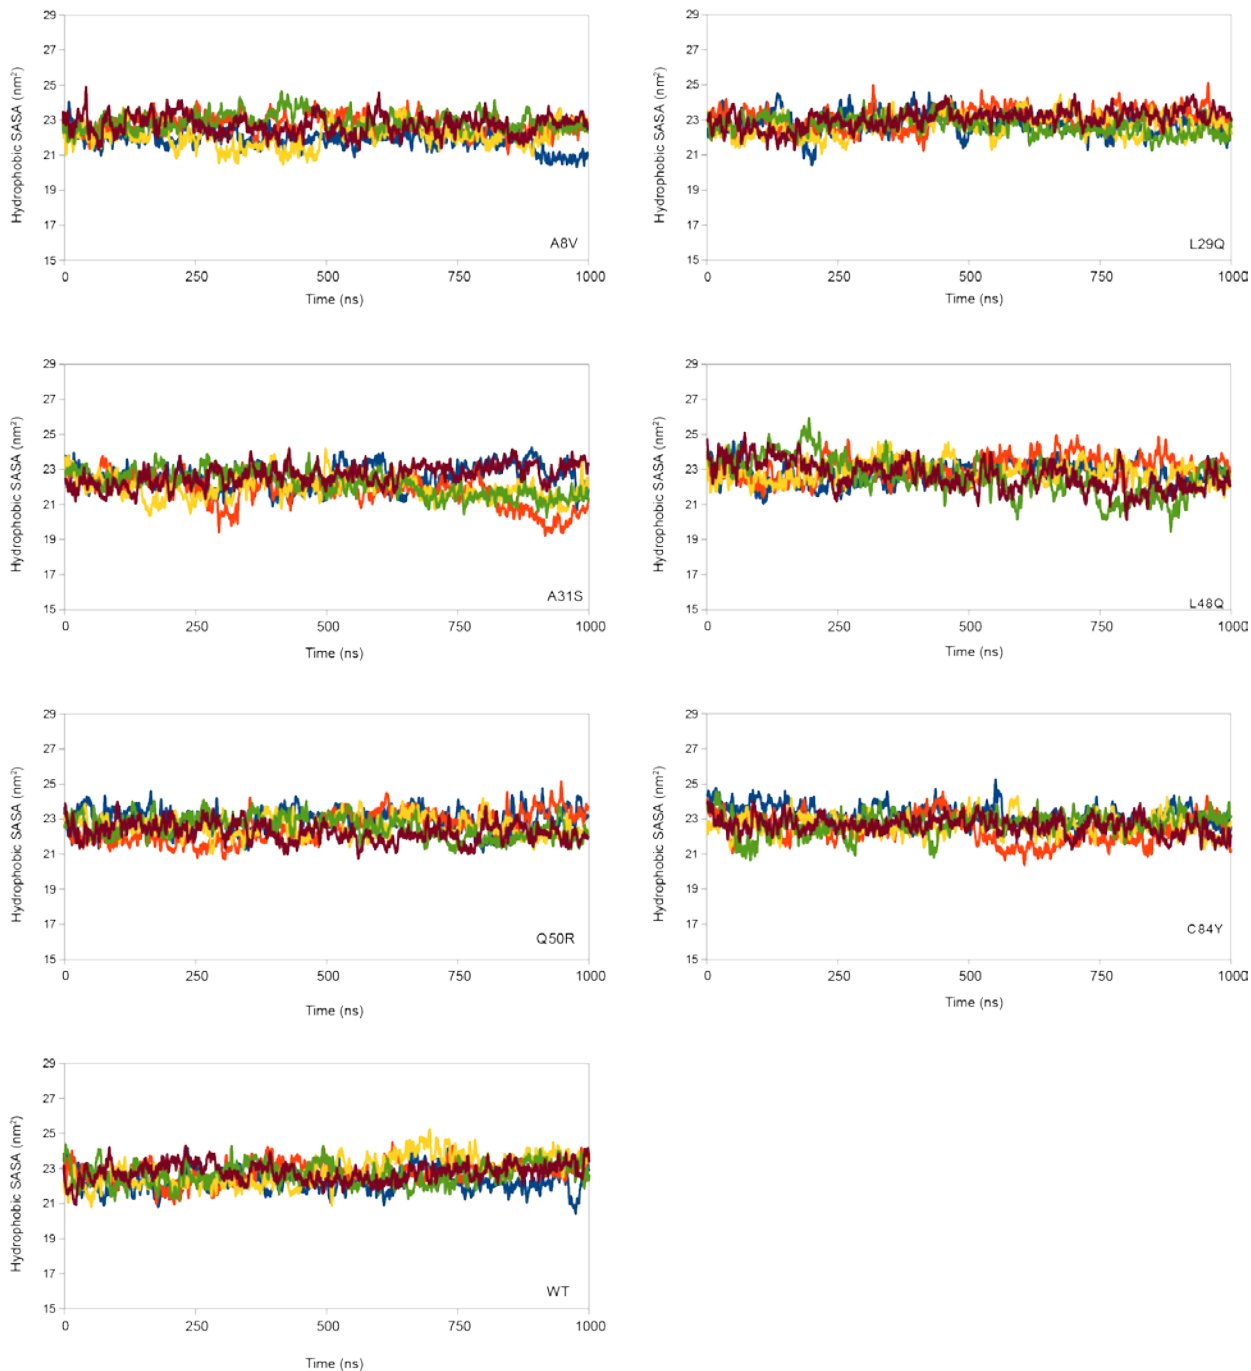

**Figure S4.** Hydrophobic solvent accessible surface area is plotted as a function of time for 5 replicated simulations for models of WT NcTnC and each of the mutated constructs. Plots are a rolling average of 250 ps. There is little difference between WT and most of the constructs, with the exception of L48Q and A31S.
